# Supplementary material for: Comparative efficacy and safety of 180 W XPS vs. 120 W HPS GreenLight laser therapy for benign prostatic hyperplasia: a systematic review and meta-analysis
Source: PeerJ. 2024 Nov 27;12:e18615. doi: 10.7717/peerj.18615 (PMC11608016; doi:10.7717/peerj.18615)
Supplement: Supplemental Information 4 [file peerj-12-18615-s004.xlsx]

## Sheet: Sheet1
Ben-zvi2013			P
	HPS		80	XPS		120
Age(X+range)	69.2	48-87		67.9	50-85
BMI	26.9	19-37		26.1	20-39
IPSS	25.4	15-35		24.2	16-34		25.4	4.13	80	24.2	3.51	120
Qol	4.8	3-6		4.5	3-6		4.8	0.62	80	4.5	0.59	120
Qmax	7.2	0-17		7	2-13		7.85	3.51	80	7	2.15	120
PVR	280	54-620		308	51-1350		280	117	80	308	253.47	120
PV	80.3	33-187		79.1	31-229		80.3	31.83	80	79.1	38.64	120
PSA	4.8	0.3-14		4.2	0.3-19		4.8	2.83	80	4.2	3.65	120
ASA	2.4	1-3		2.2	1-4				80			120
OT	79	24-223		43	15-118		79	41.14	80	43	20.1	120
laser time	37	13-105		22	7-52		37	19.02	80	22	8.78	120
energy	268	42-658		226	20-495		268	127.34	80	226	92.69	120
Capsular perforation	1	80		5	120				80			120
laser	1.5	1-5		1	1-2		1.5	0.83	80	1	0.2	120
3L flushing bag	7	2-16		4.1	1-12		7	2.89	80	4.1	2.15	120
LOS	1.5	0-5		0.3	0-2		1.5	1.03	80	0.3	0.39	120
Catheterization time	1.2	0-5		0.7	0-4		1.2	1.03	80	0.7	0.78	120
30D Readmission	5	80		5	120
30D Complications	54	80		57	120
1	54	80		57	120
hematuria>3w	14	80		15	120
Urinary retention	13	80		8	120
Dysuria >2w	23	80		32	120
Urinary incontinence	3	80		2	120
Re-treatment	1	80		0	120
3mon													change
IPSS	8.4	3-20	75	9.8	3-21	115	8.4	3.55	75	9.8	3.53	115		17	3.87	75	14.4	3.52
Qol	1.2	0-4	75	1.9	0-5	115	1.2	0.84	75	1.9	0.98	115		3.6	0.75	75	2.6	0.85
Qmax	18.1	12-34	75	19.3	14-31	115	18.1	4.59	75	19.3	3.34	115		10.25	4.16	75	12.3	2.93
PVR	45.9	0-175	75	21	0-105	115	45.9	36.53	75	21	20.61	115		234.1	103.68	75	287	243.82
6mon
IPSS	6.2	1-14	63	6.4	3-16	101	6.2	2.79	63	6.4	2.6	101		19.2	3.65	63	17.8	3.16	101
Qol	1.1	0-4	63	1.3	0-5	101	1.1	0.86	63	1.3	1	101		3.7	0.77	63	3.2	0.87	101
Qmax	18.4	9-32	63	23.2	14-32	101	18.4	4.93	63	23.2	3.6	101		10.55	4.4	63	16.2	3.14	101
PVR	39.3	0-280	63	5	0-30	101	39.3	60.06	63	5	5.99	101		240.7	101.34	63	303	250.53	101
PSA	2.2	0.05-13	63	0.9	0.5-1.2	101	2.2	2.78	63	0.9	0.14	101		2.6	2.81	63	3.3	3.58	101
Campbell2013			P
	HPS		50	XPS		50
Age(M+IQR)	68	60-73.8		66.5	60-71.8
PV	51	37.8-72.3		68	45.5-94			53.7	26.3	50	69.2	37	50
PSA	3.4	1.7-4.9		3.55	1.7-7.3
OT	65	49.5-92		56	46-78.5		68.83	32.44	50	60.17	24.81	50
laser time	50	35-72.5		45	33-63		52.5	28.62	50	47	22.9	50
Energy use	343	220.8-512.5		400	301.8-601		358.77	222.66	50	434.27	228.38	50
Energy Density	6.4	4.97-7.97		6.1	4.8-7.6		6.45	2.29	50	6.17	2.14	50
Catheterization timeh	14	12-16		12	11-14.8		0.58	0.13	50	0.53	0.12	50
PSA												change
pre-	3.4	1.7-4.9	42	3.55	1.7-7.3	45	3.33	2.44		4.18	4.27
post-3mon	1.13	0.78-1.89	42	1.4	0.82-2.70	45	1.27	0.85		1.64	1.44	PSA	2.06	2.15	42	2.54	3.76	45
IPSS			42			45
pre-	21	17-26	42	20	14-25	45	21.33	6.87		19.67	8.4	IPSS
post-3mon	9	5-12	42	7	4-14	45	8.67	5.37		8.33	7.66		12.66	6.26	42	11.34	8.06	45
Qol			42			45						QOL
术前	4	4-5	42	4	4-5	45	4.33	0.76		4.33	0.76
术后3mon	2	1-2	42	2	1-3	45	1.67	0.77		2	1.53		2.66	0.77	42	2.33	1.33	45
Qmax			42			45
pre-	9	7-11	42	9	6.2-12.2	45	9	3.05		9.13	4.58	Qmax
post-3mon	24	16.5-32.45	42	26	20.2-36	45	24.32	12.24		27.4	12.1		15.32	11.04	42	18.27	10.58	45
PVR			42			45						PVR
pre-	110	74.5-195.5	42	143	63-260	45	126.67	92.36		155.33	150.37
post-3mon	15	0-60	42	32	0-60	45	25	46.05		30.67	45.95		101.67	79.99	42	124.66	133.47	45
IIEF
complication	5	50		8	50
minor	5	50		4	50
major	0	50		4	50
Capsule perforation	0	50		1	50
Bladder neck stenosis	0	50		2	50
Urethra stenosis	0	50		1	50
Urinary retention	0	50		1	50
Eken2015			P
	HPS		88	XPS		73
Age(X+range)	70.2	50-83		68.55	49-86
PSA	2.93	0.5-10.2		2.79	0.4-15.1
PV	62.32	28-128		61.3	27-142		62.32	20.4	88	61.3	24.1	73
PVR	320	35-740		305	30-700		320	285	88	305	300	73
OT	58.67	28-98		46.89	25-95		58.67	14.27	88	46.89	14.67	73
laser time	32.63	13-53		29.71	12-66		32.63	8.15	88	29.71	11.32	73
Energy use	228.34	58-445		248.42	89-568		228.34	78.88	88	248.42	100.41	73
Catheterization time	23.23	14-72		17.63	6-69		0.97	0.49	88	0.73	0.55	73
IPSS	24.83	16-32		23.73	15-33		25	4	88	24	5	73
Qol	4.55	3-6		4.58	3-6		5	1	88	5	1	73
Qmax	7.24	4.8-11.4		7.38	5.3-12.4		7.2	1.3	88	7.4	1.3	73
Average flow rate before surgery	4.03	2-6		4.22	3-6		4	1	88	4	1	73
post-6m													变化
IPSS	8.97	2-21		8.27	2-24		9	4	88	8	3	73		16	4	88	16	4.36	73
PVR	35	0-95		40	0-100		35	60	88	40	60	73		285	260.24	88	265	274.95	73
Qol	1.35	0-4		1.22	0-4		1	1	88	1	1	73		4	1	88	4	1	73
Average flow before operation	7.85	4.3-11.3		8.34	5.4-12.4		7.9	1.2	88	8.3	1.4	73		3.9	1.11	88	4.3	1.25	73
Qmax	17.82	7.6-26.2		18.83	10-27.2		17.8	2.6	88	18.8	2.3	73		10.6	2.25	88	11.4	2	73
并发症	29	88		21	73
Transient hematuria	4	88		4	73
Urinary retention	5	88		3	73
re-intervention	2	88		1	73
Urgent incontinence	4	88		3	73
Dysuria>2w	1	88		1	73
Bladder neck stenosis	2	88		1	73
Urethral stenosis	1	88		0	73
Hueber2013			P
	HPS		1187	XPS		622
age（X）	71.54	10		68.93	10
PV	76.66	48	1187	70.1	50	622
OT	80.43	69.5	658	52.98	30.3	359
laser time	65.78	53.9	1063	29.6	17.35	593
Energy usage	267.75	174	1152	250.2	172.4	613
Number of optical fibers	2.28	1.78	749	1.1	0.3	264
Inaba2023			P
	HPS		86	XPS		86
ageM+rage	72	58-90		72	53-89
PV	120	100-250		124	100-209		147.5	30.7	86	139.3	22.3	86
PSA	8.2	0.8-157		8.1	0.8-46.1
IPSS	21.5	5-35		22	4-34
Qol	5	2-6		6	3-6
Qmax	6.3	2.3-21.3		7.6	2.3-28.4
OABSS	8	0-15		6	1-15
OT	117.5	18-189		100.5	50-175		110.5	34.97	86	106.5	25.56	86
laser time	79	24-102		63	35-83		71	15.95	86	61	9.82	86
Energy use	396.83	40-481.84		633.65	291.99-805.01		328.88	90.36	86	591.08	104.92	86
Catheterization time h	0.88	0.63-12.08		19.5	15-112		3.62	2.34	86	1.73	0.83	86
LOS	3	1-18		2	2-8		3	3.48	86	3.5	1.23	86
Hb decrease	0.8	-1.7-3		0.7	-0.7-2.4
Bleeding	7	86		1	86
Temporary urinary retention	4	86		3	86
Stress urinary incontinence	2	86		1	86
Second surgery	4	86		1	86
complication	17	86		8	86
López2016			R
	HPS		109	XPS		82
age	70.5	7.9	109	69.9	12.3	82
PV	54.2	18.3	109	53.9	20.9	82
Qmax	8.1	3.2	109	13.1	2.2	82
IPSS	22.6	5.1	109	24.6	5.9	82
Qol	4.86	0.9	109	4.89	1.1	82
PSA	3.7	3.3	109	4.3	5.9	82
OT	53.8	16.2	109	48	15.7	82
laser time	36	11.6	109	32.8	11.7	82
Energy use	242	77	109	250	105	82
LOS	65	227	109	41	34	2.71	9.46	109	1.71	1.42	82
Catheterization time	71	155	109	51	29	2.96	6.46	109	2.13	1.21	82
Catheterization time	1	109		1	82
30Dcomplications	22	109		12	82
grade1	21	109		5	82
grade2	1	109		1	82
Hematuria>3w	14	109		8	82
Urinary retention	4	109		1	82
12mon
PSA	3.198			3.039		P=0.67
PV	30.4			28.2		P=0.9
IPSS
6MON	10.9			10
12mon	8.1			8
Qol
6MON	1.73			2.06
12mon	1.38			1.6		P=0.8
Rieken2012			R
	HPS		80	XPS		80
age	72	11	80	73	8	80
PV	64	46	80	64	36	80
PSA	6	8.3	80	5.3	8.8	80
IPSS	21	6	80	15	6	80
QOL	4	2	80	3	1	80
Qmax	14.1	14.3	80	8.9	4.5	80
PVR	161	125	80	88	141	80
OT	59	36	80	60	37	80
laser time	33	23	80	33	18	80
Fiber per person	1.2	0.5	80	1.2	0.4	80
LOS	5.9	4	80	4.3	0.8	80
Catheterization time	2.2	1	80	2.3	0.6	80
Energy use	187	133	80	268	142	80
Energy density	3.2	1.2	80	4.6	2.0	80
Capsular perforation	5	80	80	7	80	80
Bleeding	12	0.15	80	12	0.15	80
Transfusion	1	0.01	80	0		80
change			80			80
PSA	2	2.5	80	2.7	2.3	80
IPSS	13	10	80	8	7	80
Qol	3	2	80	2	1	80
Qmax	19.3	9.8	80	7.8	7.6	80
PVR	140	140	80	56	83	80
complications	32	80	80	29	80
grade2	8	80	80	5	80
grade3	7	80	80	5	80
Urinary retention	7	80	80	5	80
Dysuria>2w	7	80	80	5	80
Tanchoux2012			P
	HPS		25	XPS		25
age	70.9	7.8	25	73.6	8.2	25
Qmax	8.7	4.1	25	7.3	3.2	25
PV	77	24	25	72	18	25
IPSS	17	8	25	16	5	25
PSA	4.5	3.1	25	5.4	3.7	25
Creatinine	87	23	25	98	25	25
Hb	14.1	1.7	25	13.6	1.5	25
OT	69	12	25	61	10	25
laser time	36	10	25	29	8	25
Energy use	223	100	25	281	90	25
PV change	35	18	25	37	14	25
LOS	1.29	0.88	25	1.62	1.6	25
Catheterization time	3.58	4.67	25	3.76	6.23	25
Qmax	15.8	5.1	25	16.6	5.2	25
Hb change	0.7	0.3	25	0.6	0.2	25
post-1m						变化
Qmax	14.7	7.8		12.6	6.5		6	6.76	25	5.3	5.63	25
PSA	3.6	2.5		2.7	1.3		0.9	2.85	25	2.7	3.25	25
IPSS	11	6		9	5		6	7.21	25	7	5	25
Satisfactory rating	1.37	0.53		1.59	0.46
minor	23	25	0.92	21	25
major	0			0

## Sheet: surgical
OT	study	NMD	NSD	NN	EMD	ESD	EN
1	Ben-zvi et al.2013	79	41.14	80	43	20.1	120
	Campbell2013	68.83	32.44	50	60.17	24.81	50
2	Eken et al.2015	58.67	14.27	88	46.89	14.67	73
3	Hueber et al.2013	80.43	69.5	658	52.98	30.3	359
4	Inaba et al.2023	110.5	34.97	86	106.5	25.56	86
5	López et al.2016	53.8	16.2	109	48	15.7	82
6	Rieken et al.2012	59	36	80	60	37	80
7	Tanchoux et al.2012	69	12	25	61	10	25
laser time	study	NMD	NSD	NN	EMD	ESD	EN
	Ben-zvi et al.2013	37	19.02	80	22	8.78	120
	Campbell2013	52.5	28.62	50	47	22.9	50
	Eken et al.2015	32.63	8.15	88	29.71	11.32	73
	Hueber et al.2013	65.78	53.9	1063	29.6	17.35	593
	Inaba et al.2023	71	15.95	86	61	9.82	86
	López et al.2016	36	11.6	109	32.8	11.7	82
	Rieken et al.2012	33	23	80	33	18	80
	Tanchoux et al.2012	36	10	25	29	8	25
Energy use	study	NMD	NSD	NN	EMD	ESD	EN
	Ben-zvi et al.2013	268	127.34	80	226	92.69	120
	Campbell2013	358.77	222.66	50	434.27	228.38	50
	Eken et al.2015	228.34	78.88	88	248.42	100.41	73
	Hueber et al.2013	267.75	174	1152	250.2	172.4	613
	Inaba et al.2023	328.88	90.36	86	591.08	104.92	86
	López et al.2016	242	77	109	250	105	82
	Rieken et al.2012	187	133	80	268	142	80
	Tanchoux et al.2012	223	100	25	281	90	25
Laser Fiber	study	NMD	NSD	NN	EMD	ESD	EN
	Ben-zvi et al.2013	1.5	0.83	80	1	0.2	120
	Hueber et al.2013	2.28	1.78	749	1.1	0.3	264
	Rieken et al.2012	1.2	0.5	80	1.2	0.4	80
LOS	study	NMD	NSD	NN	EMD	ESD	EN
	Ben-zvi et al.2013	1.5	1.03	80	0.3	0.39	120
	Inaba et al.2023	3	3.48	86	3.5	1.23	86
	López et al.2016	2.71	9.46	109	1.71	1.42	82
	Rieken et al.2012	5.9	4	80	4.3	0.8	80
	Tanchoux et al.2012	1.29	0.88	25	1.62	1.6	25
Catheterization time	study	NMD	NSD	NN	EMD	ESD	EN
	Ben-zvi et al.2013	1.2	1.03	80	0.7	0.78	120
	Campbell2013	0.58	0.13	50	0.53	0.12	50
	Eken et al.2015	0.97	0.49	88	0.73	0.55	73
	Inaba et al.2023	3.62	2.34	86	1.73	0.83	86
	López et al.2016	2.96	6.46	109	2.13	1.21	82
	Rieken et al.2012	2.2	1	80	2.3	0.6	80
	Tanchoux et al.2012	3.58	4.67	25	3.76	6.23	25
Energy Density	study	NMD	NSD	NN	EMD	ESD	EN
	Campbell2013	6.45	2.29	50	6.17	2.14	50
	Rieken2012	3.2	1.2	80	4.6	2.0	80

## Sheet: functional outcome
IPSS	study	NMD	NSD	NN	EMD	ESD	EN
	Ben-zvi et al.2013	19.2	3.65	63	17.8	3.16	101
	Campbell2013	12.66	6.26	42	11.34	8.06	45
	Eken et al.2015	16	4	88	16	4.36	73
	Rieken et al.2012	13	10	80	8	7	80
	Tanchoux et al.2012	6	7.21	25	7	5	25
Qol	study	NMD	NSD	NN	EMD	ESD	EN
	Ben-zvi et al.2013	3.7	0.77	63	3.2	0.87	101
	Campbell2013	2.66	0.77	42	2.33	1.33	45
	Eken et al.2015	4	1	88	4	1	73
	Rieken et al.2012	3	2	80	2	1	80
Qmax	study	NMD	NSD	NN	EMD	ESD	EN
	Ben-zvi et al.2013	10.55	4.4	63	16.2	3.14	101
	Campbell2013	15.32	11.04	42	18.27	10.58	45
	Eken et al.2015	10.6	2.25	88	11.4	2	73
	Rieken et al.2012	19.3	9.8	80	7.8	7.6	80
	Tanchoux et al.2012	6	6.76	25	5.3	5.63	25
PVR	study	NMD	NSD	NN	EMD	ESD	EN
	Ben-zvi et al.2013	240.7	101.34	63	303	250.53	101
	Campbell2013	101.67	79.99	42	124.66	133.47	45
	Eken et al.2015	285	260.24	88	265	274.95	73
	Rieken et al.2012	140	140	80	56	83	80
PSA	study	NMD	NSD	NN	EMD	ESD	EN
	Ben-zvi et al.2013	2.6	2.81	63	3.3	3.58	101
	Campbell2013	2.06	2.15	42	2.54	3.76	45
	Rieken et al.2012	2	2.5	80	2.7	2.3	80
	Tanchoux et al.2012	0.9	2.85	25	2.7	3.25	25

## Sheet: complication
total complication	study	120E	NN	180E	EN
	Ben-zvi et al.2013	54	80	57	120
	Campbell2013	5	50	8	50
	Eken et al.2015	29	88	21	73
	Inaba et al.2023	17	86	8	86
	López et al.2016	22	109	12	82
	Rieken et al.2012	32	80	29	80
	Tanchoux et al.2012	23	25	21	25
minor complications	study	120E	NN	180E	EN
	Ben-zvi et al.2013	54	80	57	120
	Campbell2013	5	50	4	50
	López et al.2016	22	109	6	82
	Rieken et al.2012	25	80	24	80
	Tanchoux et al.2012	23	25	21	25
major	study
	Campbell2013	0	50	4	50
	Rieken et al.2012	7	80	5	80
Capsule perforation	study	120E	NN	180E	EN
	Ben-zvi et al.2013	1	80	5	120
	Campbell2013	0	50	1	50
	Rieken et al.2012	5	80	7	80
dysuria	study	120E	NN	180E	EN
	Ben-zvi et al.2013	23	80	32	120
	Eken et al.2015	1	88	1	73
	Rieken et al.2012	7	80	5	80
Urinary retention	study	120E	NN	180E	EN
	Ben-zvi et al.2013	13	80	8	120
	Campbell2013	0	50	1	50
	Eken et al.2015	5	88	3	73
	Inaba et al.2023	4	86	3	86
	López et al.2016	4	109	1	82
	Rieken et al.2012	7	80	5	80
	Tanchoux et al.2012
retreatment	study	120E	NN	180E	EN
	Ben-zvi et al.2013	1	80	0	120
	Eken et al.2015	2	88	1	73
	Inaba et al.2023	4	86	1	86
	López et al.2016	1	109	1	82
Bladder neck stenosis
	Campbell2013	0	50	2	50
	Eken et al.2015	2	88	1	73
尿道狭窄	Campbell2013	0	50	1	50
	Eken et al.2015	1	88	0	73
